# Supplementary material for: Immunogenicity and Protective Efficacy of a SARS-CoV-2 mRNA Vaccine Encoding Secreted Non-Stabilized Spike Protein in Mice
Source: Research Square preprint supplement (doi:10.21203/rs.3.rs-2059545/v1), 2022-09-27
Supplement: Supplementary file [file 59346fd09edc610e5bfe12c6.pdf]

**Supplementary Table 1:** Percent reduction of SARS-CoV-2 RNA in tissues

| Tissues          | % Reduction  |               |
|------------------|--------------|---------------|
|                  | 1 µg/Control | 10 µg/Control |
| Nasal turbinates | 99.9%        | 99.9%         |
| Brain            | 100%         | 100%          |
| Lung             | 100%         | 99.9%         |

**Note:** 10 µg/Control = % Reduction of 10 µg dosed group comparing to control

1 µg/Control = % Reduction of 1 µg dosed group comparing to control
